# Supplementary material for: Repetitio est mater studiorum—implementation of ENT cases in case-based e-learning
Source: HNO. 2024 Jan 5;72(3):166–72. [Article in German] doi: 10.1007/s00106-023-01409-4 (PMC10879404; doi:10.1007/s00106-023-01409-4)
Supplement: Supplementary file 1 [file 106_2023_1409_MOESM1_ESM.pdf]

# MUSTER

EvaSys

Evaluation der HNO CaseTrain

Electric Paper  
EVALUATIONSSYSTEME

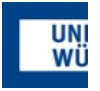

Bitte so markieren: ☐ ☒ ☐ ☐ ☐ Bitte verwenden Sie einen Kugelschreiber oder nicht zu starken Filzstift. Dieser Fragebogen wird maschinell erfasst.  
Korrektur: ☐ ☒ ☐ ☒ ☐ Bitte beachten Sie im Interesse einer optimalen Datenerfassung die links gegebenen Hinweise beim Ausfüllen.

## 1. Demographie

### 1.1 Wie alt sind Sie?

1.2 Welches Geschlecht haben Sie? ☐ männlich ☐ weiblich ☐ divers

## 2. Inhalt und Struktur

- |                                                                                                                                          |                            |                          |                          |                          |                          |                          |                 |
|------------------------------------------------------------------------------------------------------------------------------------------|----------------------------|--------------------------|--------------------------|--------------------------|--------------------------|--------------------------|-----------------|
| 2.1 Die Fragestellungen im den CaseTrains waren verständlich formuliert.                                                                 | Trifft überhaupt nicht zu. | <input type="checkbox"/> | Trifft voll zu. |
| 2.2 Die Erläuterungen zu den Antwortmöglichkeiten der CaseTrains waren verständlich formuliert.                                          | Trifft überhaupt nicht zu. | <input type="checkbox"/> | Trifft voll zu. |
| 2.3 Die CaseTrains waren ein hilfreiches Element zur Vorbereitung für die HNO-Klausur.                                                   | Trifft überhaupt nicht zu. | <input type="checkbox"/> | Trifft voll zu. |
| 2.4 Der thematische Inhalt der CaseTrains war mir aus den Vorlesungen bekannt.                                                           | Trifft überhaupt nicht zu. | <input type="checkbox"/> | Trifft voll zu. |
| 2.5 Durch die CaseTrains wurde mir Wissen vermittelt, welches mir aus den Vorlesungen nicht bekannt war.                                 | Trifft überhaupt nicht zu. | <input type="checkbox"/> | Trifft voll zu. |
| 2.6 Ich bevorzuge fallbasiertes E-Learning (CaseTrain) im Vergleich zu fallbasierter Präsenzlehre (bspw. Seminar mit Fallbesprechungen). | Trifft überhaupt nicht zu. | <input type="checkbox"/> | Trifft voll zu. |
| 2.7 CaseTrains sollten vermehrt Anwendung finden, um Lehrinhalte aus Vorlesungen zu überprüfen und zu rekapitulieren.                    | Trifft überhaupt nicht zu. | <input type="checkbox"/> | Trifft voll zu. |

## 3. Motivation

- |                                                                                                      |                            |                          |                          |                          |                          |                          |                 |
|------------------------------------------------------------------------------------------------------|----------------------------|--------------------------|--------------------------|--------------------------|--------------------------|--------------------------|-----------------|
| 3.1 Mein Interesse für das Fach Hals-, Nasen-, Ohrenheilkunde wurde durch die CaseTrains gesteigert. | Trifft überhaupt nicht zu. | <input type="checkbox"/> | Trifft voll zu. |
| 3.2 Meine Motivation zur Nutzung von CaseTrains <b>vor</b> dem Semester war:                         | Sehr niedrig.              | <input type="checkbox"/> | Sehr hoch.      |
| 3.3 Meine Motivation zur Nutzung von CaseTrains <b>nach</b> dem Semester war:                        | Sehr niedrig.              | <input type="checkbox"/> | Sehr hoch.      |

## 4. Lob, Kritik und Feedback

# MUSTER

## 4. Lob, Kritik und Feedback [Fortsetzung]

4.1 Was fandest du besonders gut an den CaseTrains der HNO-Heilkunde?

4.2 Hast du konkrete Verbesserungsvorschläge für die CaseTrains der HNO-Heilkunde?
